# Supplementary material for: BcAMT1;5 Mediates Nitrogen Uptake and Assimilation in Flowering Chinese Cabbage and Improves Plant Growth When Overexpressed in Arabidopsis
Source: MDPI journal article supplement (doi:10.3390/horticulturae9010043), 2023-01-01
Supplement: s1 [file s1]

# ***BcAMT1;5* Mediates Nitrogen Uptake and Assimilation in Flowering Chinese Cabbage and Improves Plant Growth When Overexpressed in *Arabidopsis***

**Table S1.** The primers were used in the study

| Primer name             | Sequence (5'–3')                                                                        | Usage                                                                                                      |
|-------------------------|-----------------------------------------------------------------------------------------|------------------------------------------------------------------------------------------------------------|
| BcAMT1;5                | F: GCAGGTCGACTCTAGAAATGTCTGGAGCTATAACATGC<br>R: ACGAGCTCGGTACCCGGGTCAAAGAGCTGGAGGATCAG  | Cloning <i>BcAMT1;5</i> into pCAMBIA3301 vector using <i>Xba</i> I and <i>Sma</i> I sites                  |
| pYES-AMT1;5             | F: CAGTGTGCTGGAATTCATGTCTGGAGCTATAACATGC<br>R: ATGCGGCCCTCTAGATCAAAGAGCTGGAGGATCAG      | Cloning <i>BcAMT1;5</i> into pYES2 vector using <i>EcoR</i> I and <i>Xba</i> I sites                       |
| pBI-AMT1;5              | F: CACGGGGGACTCTAGAATGTCTGGAGCTATAACATGC<br>R: TCCTTTACCCATCCCGGAAGAGCTGGAGGATCAG       | Cloning <i>BcAMT1;5</i> into pBI121 vector using <i>Xba</i> I and <i>Sma</i> I sites                       |
| BcAMT1;5 <sub>pro</sub> | F: CCGGCGCGCCAAGCTTTGTCAATGTCCACAATTCC<br>R: GGGATCCGTCGACCTGCAGTTGAGAGACCTTAGAAGGAAAGC | Cloning <i>BcAMT1;5<sub>pro</sub></i> into pCAMBIA1391 vector using <i>Hind</i> III and <i>Pst</i> I sites |
| q-BcAMT1;5              | F: AGTGCCACAATGGGAACAC<br>R: GAGCTGGAGGATCAGAACG                                        | qPCR for the cDNA of flowering Chinese cabbage                                                             |
| GADPH                   | F: CAGGTTTGGAAATTGTCGAGG<br>R: GAGCTGTGGAAGCACCTTTC                                     |                                                                                                            |
| Actin8                  | F: AGGAGCCTCGGTAAGAAGAAC<br>R: TTAGCAACTGGGATGACATGG                                    |                                                                                                            |
| q-AtGLN1;1              | F: CAACCTTAACCTCTCAGACTCCACT<br>R: CAGCTGCAACATCAGGGTTGCTA                              | qPCR for the cDNA of <i>Arabidopsis</i>                                                                    |
| q-AtGLN1;2              | F: TAACCTTGACATCTCAGACAACAGT<br>R: TCAGCAATAACATCAGGGTTAGCA                             |                                                                                                            |
| q-AtGLN2                | F: CCAACATGTCAGATGAGAGTGCC<br>R: CCAGGTGCTTGACCGGTACTCG                                 |                                                                                                            |
| q-AtGDH2                | F: CCAACATGTCAGATGAGAGTGCC<br>R: CCAGGTGCTTGACCGGTACTCG                                 |                                                                                                            |
| q-AtGLT1                | F: GGTCTTCCATGGGAAGTGGG<br>R: TAGCAATTCACAGGGCAG                                        |                                                                                                            |
| q-ACTIN2                | F: TCGGTGGTTCCATTCTTGCT<br>R: GCTTTTAAGCCTTTGATCTTGAGAG                                 |                                                                                                            |

**Table S2.** The sequence information for each AMT protein used for the phylogenetic analysis.

| Species                                                                                                               | Protein name | Accession numbers |
|-----------------------------------------------------------------------------------------------------------------------|--------------|-------------------|
| Flowering Chinese cabbage<br>( <i>Brassica campestris</i> L. ssp.<br><i>chinensis</i> var. <i>utilis</i> Tsen et Lee) | BcAMT1;5     | MF966940          |
| <i>Arabidopsis thaliana</i>                                                                                           | AtAMT1;1     | NP_193087.1       |
|                                                                                                                       | AtAMT1;2     | NP_176658.1       |
|                                                                                                                       | AtAMT1;3     | NP_189073.1       |
|                                                                                                                       | AtAMT1;4     | NP_194599.1       |
|                                                                                                                       | AtAMT1;5     | NP_189072.1       |
|                                                                                                                       | AtAMT2       | NP_181363         |
| <i>Brassica rapa</i>                                                                                                  | BrAMT1;1     | XP_009124614      |
|                                                                                                                       | BrAMT1;2     | XP_009111404.1    |
|                                                                                                                       | BrAMT1;3     | XP_009102522.1    |
|                                                                                                                       | BrAMT1;4     | XP_009129394.1    |
|                                                                                                                       | BrAMT1;5     | XP_009135885.1    |
|                                                                                                                       | BrAMT2       | XP_009143404.1    |
|                                                                                                                       | BrAMT2like   | XP_009141731.1    |
| <i>Oryza sativa</i>                                                                                                   | OsAMT1;1     | XP_015636241.1    |
|                                                                                                                       | OsAMT1;2     | XP_015623207.1    |
|                                                                                                                       | OsAMT1;3     | XP_015624850.1    |
|                                                                                                                       | OsAMT2;1     | XP_015639562.1    |
|                                                                                                                       | OsAMT2;2     | XP_015643018.1    |
|                                                                                                                       | OsAMT2;3     | XP_015621584.1    |
|                                                                                                                       | OsAMT3;1     | XP_015622013.1    |
|                                                                                                                       | OsAMT3;2     | XP_015630045.1    |
|                                                                                                                       | OsAMT3;3     | XP_015626434.1    |
|                                                                                                                       | OsAMT4;1     | Q10CV4.1          |
| <i>Populus trichocarpa</i>                                                                                            | PtrAMT1;1    | XP_002314518.2    |
|                                                                                                                       | PtrAMT1;2    | XP_002325790.1    |
|                                                                                                                       | PtrAMT1;4    | XP_002301837.1    |
|                                                                                                                       | PtrAMT2      | XP_002309151.1    |
|                                                                                                                       | PtrAMT2;2    | XP_002323600.2    |
|                                                                                                                       | PtrAMT3;1    | XP_002324271.3    |
|                                                                                                                       | PtrAMT4;1    | XM_002302048.1    |

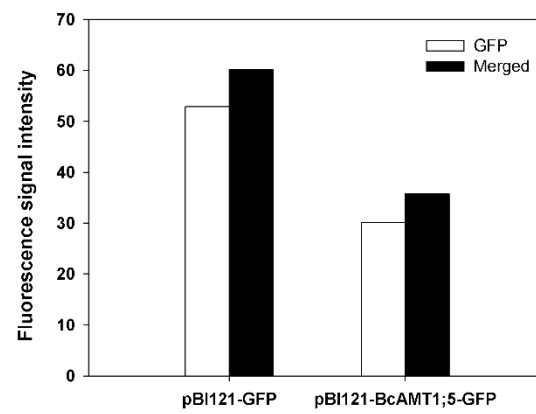

**Figure S1.** The fluorescence signal intensity of pBI121-GFP and pBI121-BcAMT1;5-GFP in onion epidermal cells.

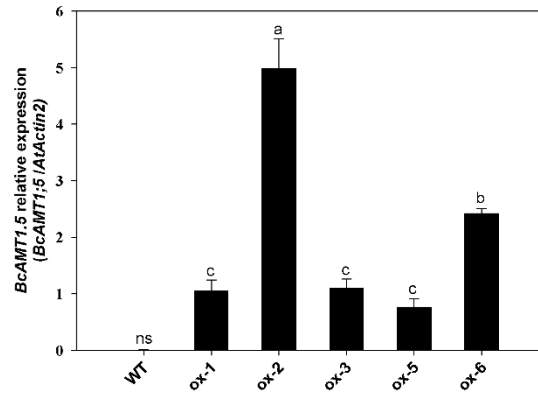

**Figure S2.** Identification of qPCR in different *BcAMT1;5*-overexpressing lines. WT: wild-type; ox-1, ox-2, ox-3, ox-5, and ox-6 represent overexpressing *BcAMT1;5* lines 1, 2, 3, 5, and 6, respectively. Bars indicate mean  $\pm$  SE ( $n = 3$ ), different letters above the bars indicate significant differences at  $p < 0.05$ .

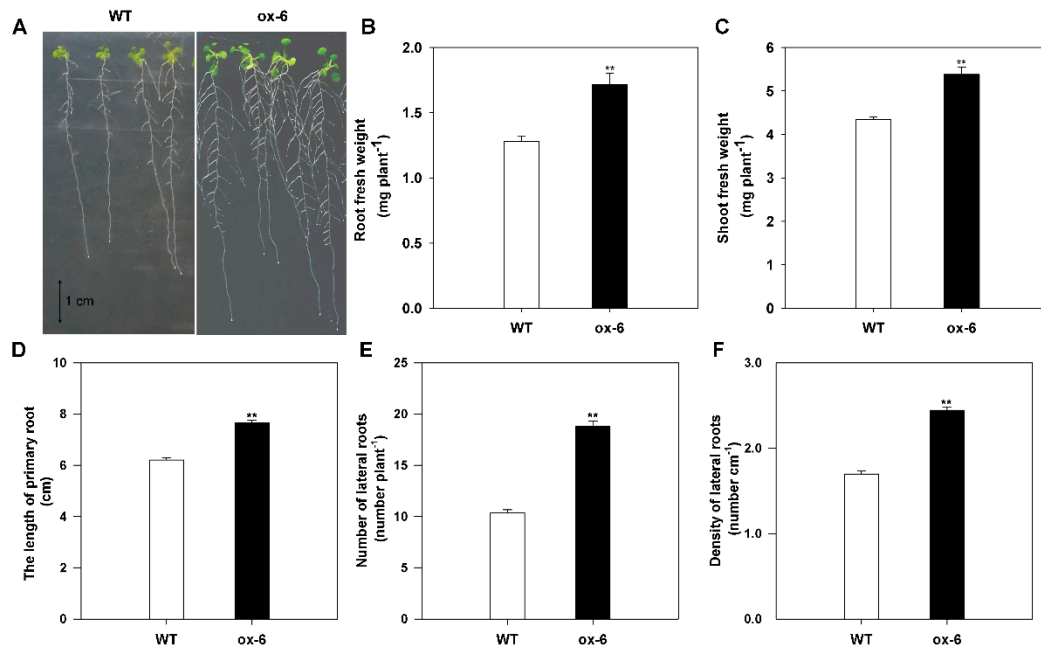

**Figure S3.** Overexpression *BcAMT1;5* in *Arabidopsis* improves plant growth on the mixture of 0.0625 mmol L<sup>-1</sup> NH<sub>4</sub><sup>+</sup> and 0.1875 mmol L<sup>-1</sup> NO<sub>3</sub><sup>-</sup> as N source. (A) The growth phenotype of T<sub>4</sub> transgenic lines together with wildtype and vector on low NH<sub>4</sub><sup>+</sup> concentration. Seedlings were grown vertically on solid medium containing the mixture of 0.0625 mmol L<sup>-1</sup> NH<sub>4</sub><sup>+</sup> and 0.1875 mmol L<sup>-1</sup> NO<sub>3</sub><sup>-</sup> for 10 d after a 4 d pre-culture on 4 mmol L<sup>-1</sup> NO<sub>3</sub><sup>-</sup>. (B, C) Root and shoot fresh weight of wildtype, and the lines of overexpressing *BcAMT1;5*. (D, E, F) The length of primary root, the number of lateral roots, and density of lateral roots of wildtype in wildtype and the lines of overexpressing *BcAMT1;5*. Data represent mean ± SE (*n*=10), different letters above the bars indicate significant differences at *p* < 0.05, and \*\* in the histogram shows significant differences at *p* < 0.01.
